# Supplementary material for: The MFS efflux pump EmrKY contributes to the survival of Shigella within macrophages
Source: PubMed Central journal article supplement (PMC6393483; doi:10.1038/s41598-019-39749-3), 2019-02-27
Supplement: 41598_2019_39749_MOESM1_ESM.pdf [file 41598_2019_39749_MOESM1_ESM.pdf]

# The MFS efflux pump EmrKY contributes to the survival of *Shigella* within macrophages

Pasqua M., Grossi M., Scinicariello S., Aussel L., Barras F., Colonna B. and Prosseda G.

Fig S1

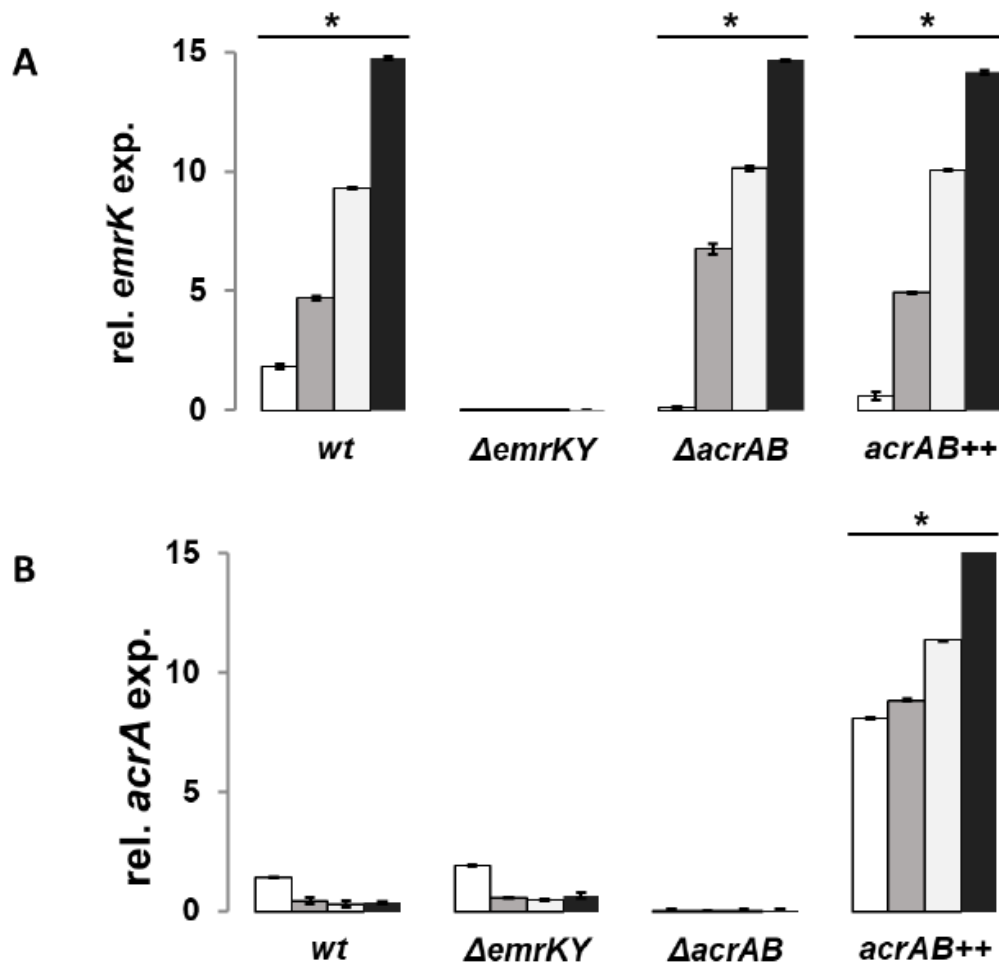

**Figure S1. *emrK* expression during *S. flexneri* infection of U937 is independent from *acrA* transcription and *vice versa*.** Quantitative analysis of (A) *emrK* and (B) *acrA* transcripts was performed by Real Time PCR assay using RNA extracted from intracellular *S. flexneri* M90T and its derivatives lacking EmrKY (M90T  $\Delta emrKY$ ) or AcrAB (M90T  $\Delta acrAB$ ) EP or carrying the pACacrAB plasmid. The *emrK* and *acrA* expression was followed in each infecting strain from 0h up to 3h post-infection. At least three experiments were carried out and the results are shown relative to the expression in bacteria grown in RPMI. Statistical significance was determined by a one-tailed ANOVA, and p values are as follows: \* p<0.05, \*\* p<0.01. Error bars represent SD.

## The MFS efflux pump *EmrKY* contributes to the survival of *Shigella* within macrophages

Pasqua M., Grossi M., Scinicariello S., Aussel L., Barras F., Colonna B. and Prosseda G.

**Table S1.** Strains and plasmids used in this study

| <b>Strain</b>              | <b>Relevant characteristics</b>                                         | <b>Source/Reference</b> |
|----------------------------|-------------------------------------------------------------------------|-------------------------|
| DH10b                      | <i>E. coli K12</i>                                                      | [44]                    |
| M90T                       | <i>S. flexneri 5a</i>                                                   | [30]                    |
| M90T $\Delta$ <i>mdtJI</i> | M90T mutant defective in <i>mdtJI</i> operon                            | [27]                    |
| M90T $\Delta$ <i>emrKY</i> | M90T mutant defective in <i>emrKY</i> operon                            | This study              |
| M90T $\Delta$ <i>acrAB</i> | M90T mutant defective in <i>acrAB</i> operon                            | This study              |
| M90T $\Delta$ <i>evgA</i>  | M90T mutant defective in <i>evgA</i> gene                               | This study              |
| M90T $\Delta$ <i>evgS</i>  | M90T mutant defective in <i>evgS</i> gene                               | This study              |
| M90T $\Delta$ <i>fnr</i>   | M90T mutant defective in <i>fnr</i> gene                                | This study              |
|                            |                                                                         |                         |
| <b>Plasmid name</b>        | <b>Relevant characteristics</b>                                         | <b>Source/Reference</b> |
| pKD4                       | <i>kan</i> -containing plasmid, template for PCR                        | [45]                    |
| pKD46                      | Red recombinase expression plasmid                                      | [45]                    |
| pGIP7                      | pACYC184 derivative carrying Ptac promoter                              | [47]                    |
| pZEP08                     | GFP reporter plasmid; Ap <sup>R</sup> , Cm <sup>R</sup>                 | [46]                    |
| pAC <i>acrAB</i>           | pGIP7 derivative carrying <i>S. flexneri acrAB</i> operon               | This study              |
| pZ <i>emrKYgfp</i>         | pZEP08 derivative carrying the <i>S. flexneri emrKY</i> promoter region | This study              |
| pZ <i>mdtJIgfp</i>         | pZEP08 derivative carrying the <i>S. flexneri mdtJI</i> promoter region | This study              |

## The MFS efflux pump *EmrKY* contributes to the survival of *Shigella* within macrophages

Pasqua M., Grossi M., Scinicariello S., Aussel L., Barras F., Colonna B. and Prosseda G.

**Table S2.** Oligonucleotides used in this study

| Name           | Sequence (5'-3')                                                               | Used for                      |
|----------------|--------------------------------------------------------------------------------|-------------------------------|
| KYF            | TCACTGGATAAAACTGATGCCACTATCGCACTC<br>AATAGTGTAGGCTGGAGCTGCTTC                  | <i>emrKY</i> deletion         |
| KYR            | TGTCACAGAACGCCAGTAATAGCAAACCGCAT<br>ACATCAATTCCGGGGATCCGTCGACC                 | <i>emrKY</i> mutation         |
| ABF            | ACTTTTGACCATTGACCAATTTGAAATCGGACA<br>CTCGAGGTTTACATATGTGTAGGCTGGAGCTGC<br>TTCG | <i>acrAB</i> mutation         |
| ABR            | TAGGCATGTCTTAACGGCTCCTGTTAAGTTAA<br>GACTTGGACTGTTCAAGGATTCGGGGATCCGTC<br>GACC  | <i>acrAB</i> mutation         |
| AF             | AAAGACCACAACAGAGAAGAAAAAATAGGG<br>TAAAAACTTCATATGAATATCCTCCTTA                 | <i>evgA</i> mutation          |
| AR             | CTGTATTACTACAGGGAGAAGGGAGATGCTTC<br>ATTGCAAAGTGTAGGCTGGAGCTGCTTC               | <i>evgA</i> mutation          |
| SF             | ATCTTTACACATTCGCGCAACGTAACAAAATC<br>GGCTAATCGTGTAGGCTGGAGCTGCTTC               | <i>evgS</i> mutation          |
| SR             | AAGATGTGCTGGTAAATAGCTCCCACATTAGA<br>ACATTGTGGAATATCCTCCTTAGTTCC                | <i>evgS</i> mutation          |
| <i>pacrABF</i> | NNN GGATCCATGACCAATTTGAAATC                                                    | Cloning <i>acrAB</i> genes    |
| <i>pacrABR</i> | NNN GGATCCATACGTGGTTAATACT                                                     |                               |
| KPF            | NNNCCCGGGTTACGAATTGCTGCGATAGC                                                  | Cloning <i>emrKY</i> promoter |
| KPR            | NNNTCTAGATGACCAATAGGCATAGGCAC                                                  |                               |
| JPF            | NNNCCCGGGCTCGGCGGCAAAACGGATA                                                   |                               |
| JPR            | NNNTCTAGAGACGCTCGCCCATTTTCATTG                                                 | Cloning <i>mdtII</i> promoter |
| <i>acrAF</i>   | GTCTATCACCTACGCGCTATCTT                                                        | Real Time PCR                 |
| <i>acrAR</i>   | GCGCGCACGAACATACC                                                              | Real Time PCR                 |
| <i>acrDF</i>   | GTACCCTGGCGATTTTTTCATT                                                         | Real Time PCR                 |
| <i>acrDR</i>   | CGGTCCTCGCACATTCA                                                              | Real Time PCR                 |
| <i>bcrF</i>    | TGTTTTTCTGTTTCGTGATGAGGAT                                                      | Real Time PCR                 |
| <i>bcrR</i>    | GGAACATATTTAACGCCGCAAT                                                         | Real Time PCR                 |
| <i>emrAF</i>   | CGTTCCAGCCACCAATATGTG                                                          | Real Time PCR                 |
| <i>emrAR</i>   | CCGTAAATATCGGTGGTGTATGG                                                        | Real Time PCR                 |
| <i>emrDF</i>   | GTGGATCCCCGACTGGTTT                                                            | Real Time PCR                 |
| <i>emrDR</i>   | CCCGGCACCGAAAAAGA                                                              | Real Time PCR                 |

## The MFS efflux pump EmrKY contributes to the survival of *Shigella* within macrophages

Pasqua M., Grossi M., Scinicariello S., Aussel L., Barras F., Colonna B. and Prosseda G.

|       |                             |               |
|-------|-----------------------------|---------------|
| emrEF | CACCAGGATGAAAACGGTGAGT      | Real Time PCR |
| emrER | TGACCTCTGCAAGTATTGCGC       | Real Time PCR |
| emrKF | GCGTTAAACGTACGGATATTAAGA    | Real Time PCR |
| emrKR | ACTGTTTCGCCGACCTGAAC        | Real Time PCR |
| fsrF  | ACGCTGATTTTACCCTACGCC       | Real Time PCR |
| fsrR  | AGCGTAGACCAGAATGGCAGAG      | Real Time PCR |
| macAF | CGACGCCGGAAAAGGTAAA         | Real Time PCR |
| macAR | ATGCACTTGCGCGGTCATA         | Real Time PCR |
| mdfAF | CTTGCTGTTAGCGCGTCTGA        | Real Time PCR |
| yceLF | TTTTCACCCCTGATTTGTCTGTTTTAT | Real Time PCR |
| yceLR | CAGCGAAAGCACTTAAGGTTTCA     | Real Time PCR |
| mdtJF | TGATGAAAATTGCCGGGTAA        | Real Time PCR |
| mdtJR | CGCTTACGGGTACCTGATTTTA      | Real Time PCR |
| ydhEF | CCGGTTATCGCGCAATTAAT        | Real Time PCR |
| ydhER | GAAACCTTGTCGCACCTGATG       | Real Time PCR |
| yidYF | TATCCCGCCGGGATTGATAT        | Real Time PCR |
| yidYR | CGCTTCGCTGGCATTGA           | Real Time PCR |
| nusAF | TGAAGCCGCACGTTATGAAG        | Real Time PCR |
| nusAR | TCAACGTAATCGCCCAAGTT        | Real Time PCR |
| evgAF | TCTTGCTATCGCAGCAATTCG       | Real Time PCR |
| evgAR | AAGTGTTTCCACCCGCTGAAC       | Real Time PCR |
